# Supplementary material
Source: PubMed Central journal article supplement (PMC8882317)

**Figure 3A**

pERK

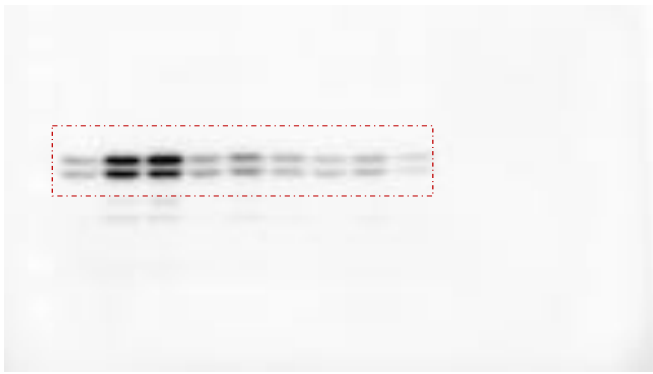

tERK

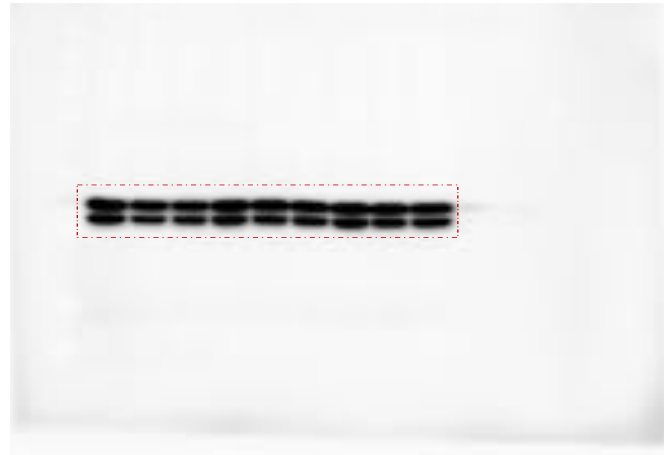

pIκB

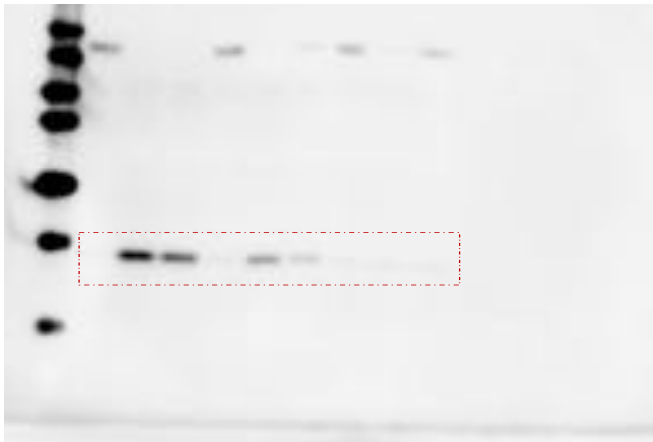

tIκB

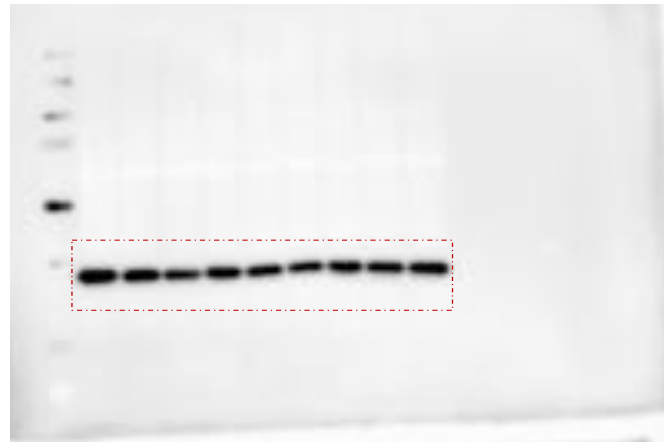

GAPDH

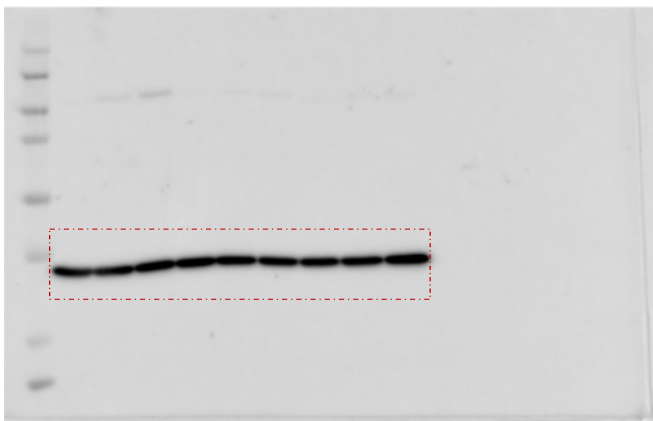

**Figure 3B**

pERK

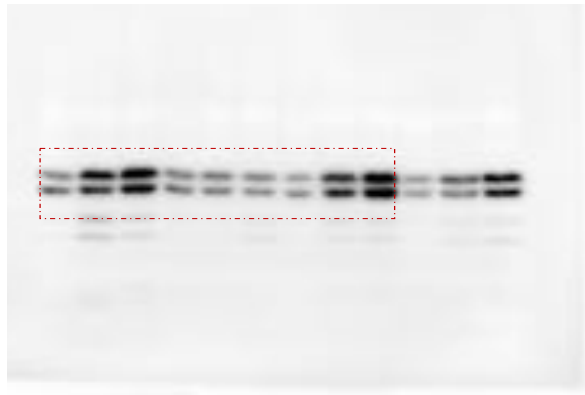

tERK

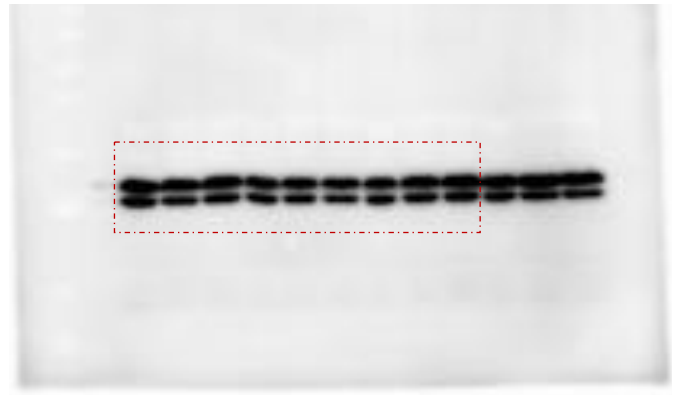

pIκB

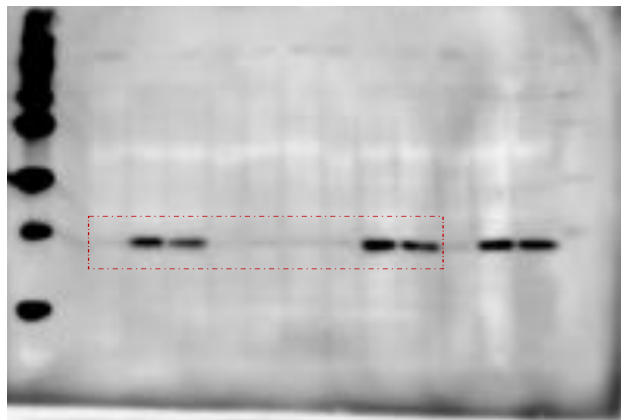

tIκB

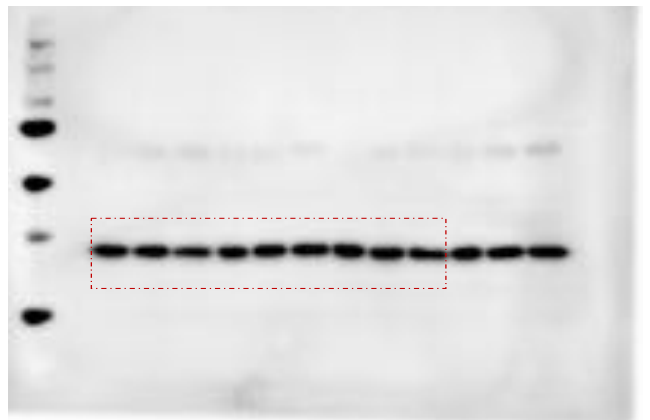

Actin

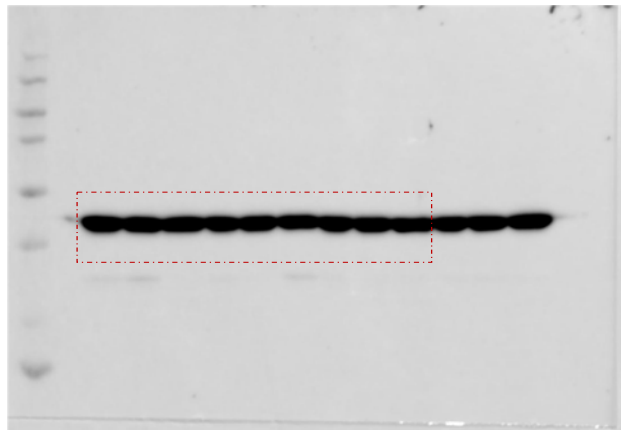

**Figure 3C**

pERK

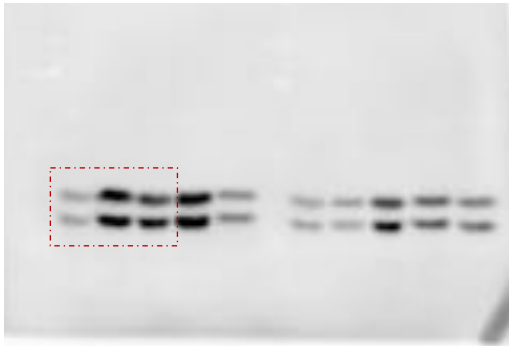

tERK

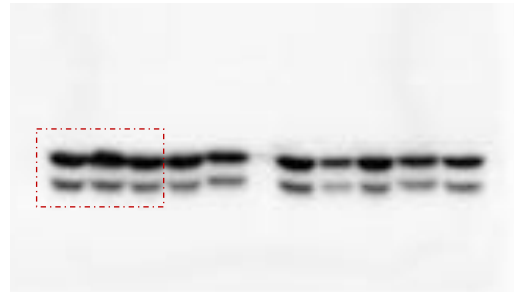

plkB

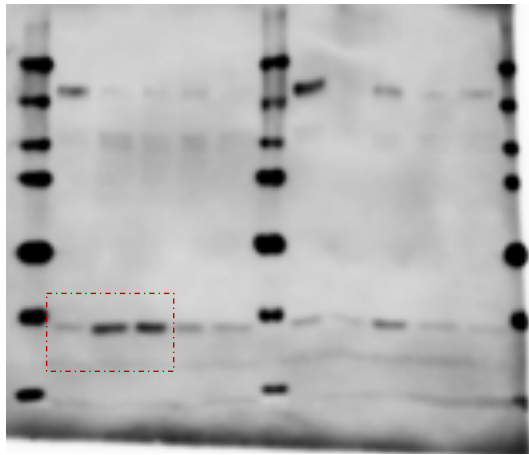

tlkB

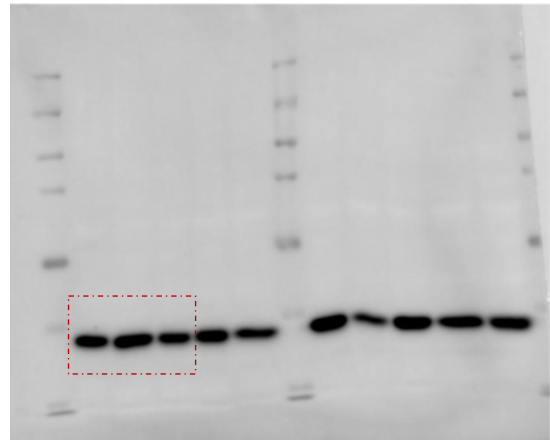

Actin

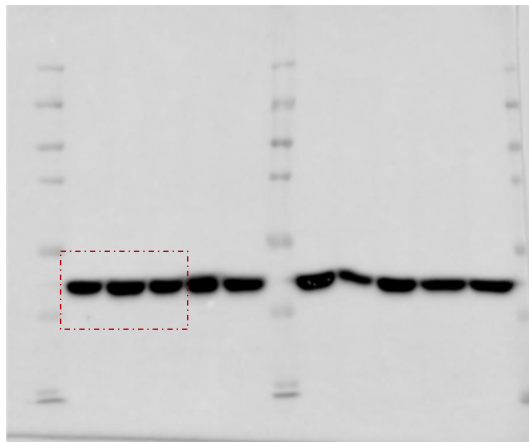

**Figure 3D**

pERK

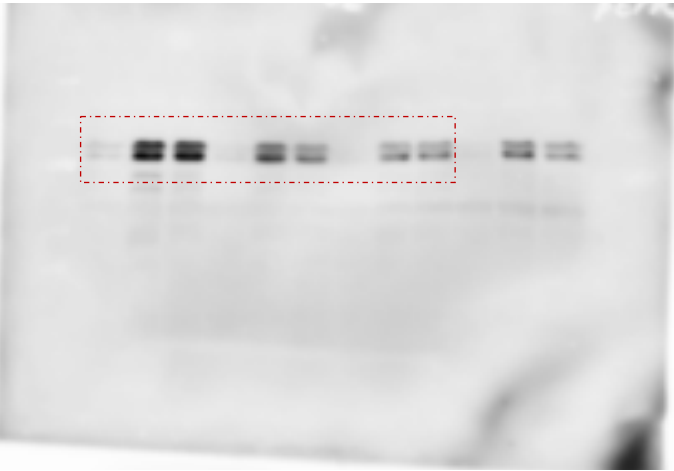

tERK

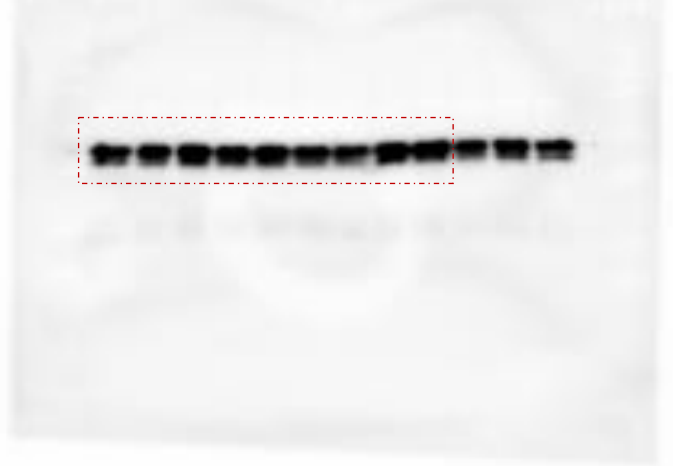

pIkB

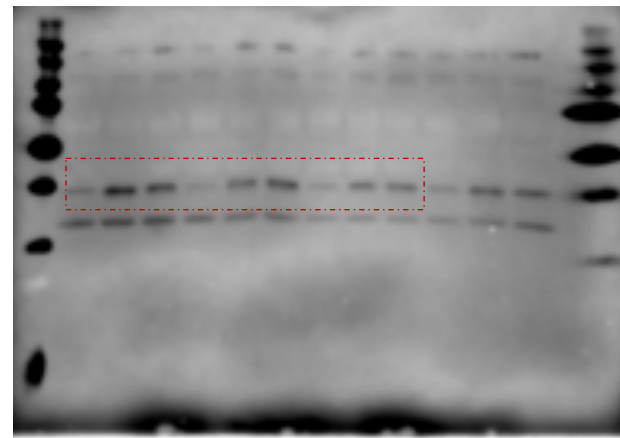

tIkB

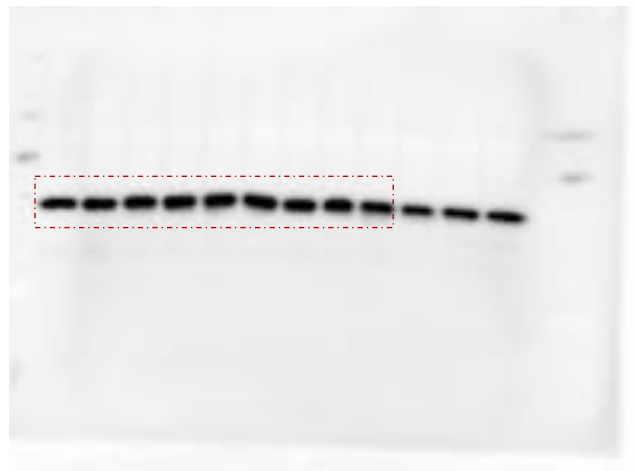

Actin

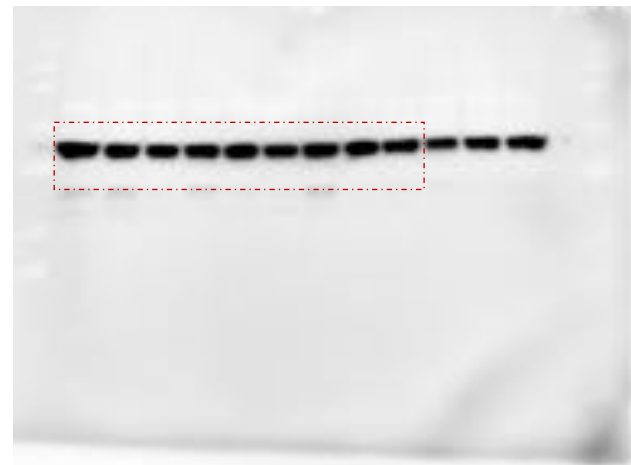

**Figure 3E**

pERK

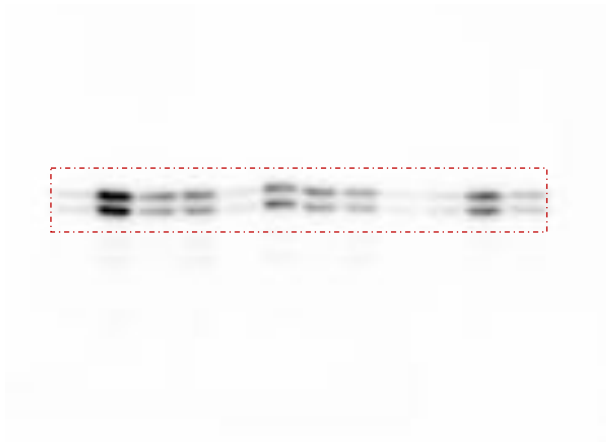

tERK

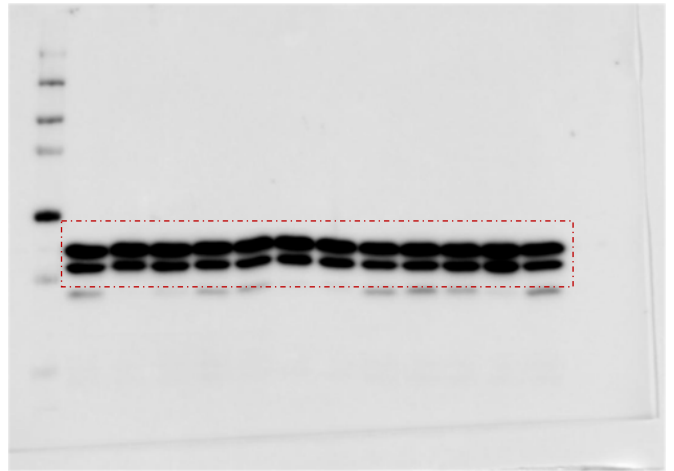

pI $\kappa$ B

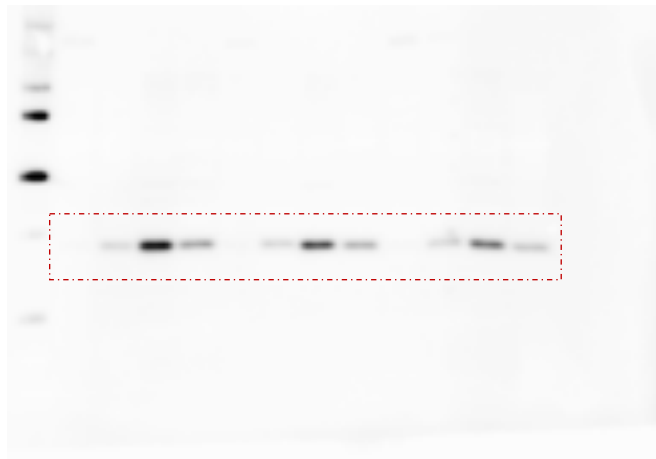

tI $\kappa$ B

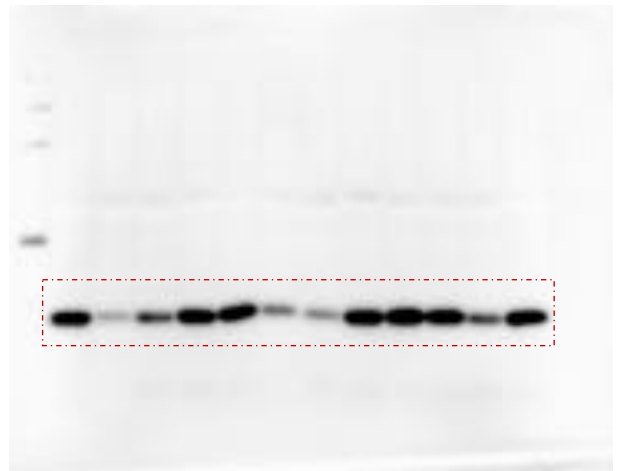

Actin

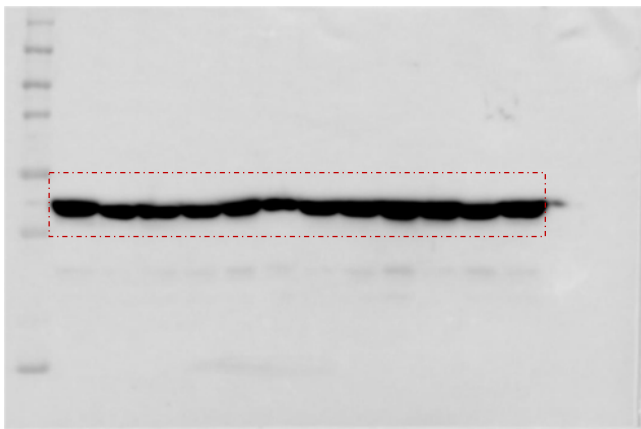

**Figure 3J**

Input His-Envelope

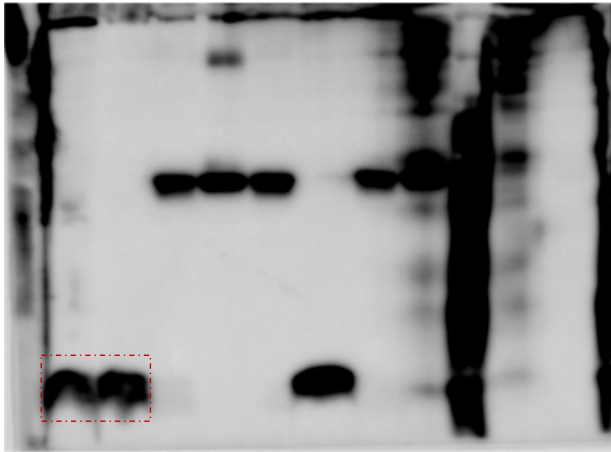

IP His-Envelope

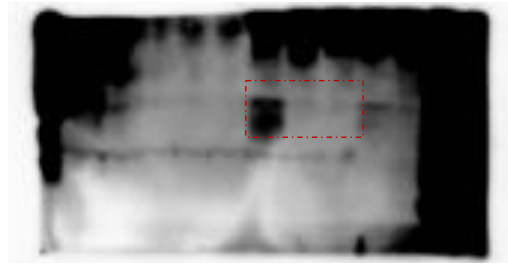

Input Flag-hTLR2/3

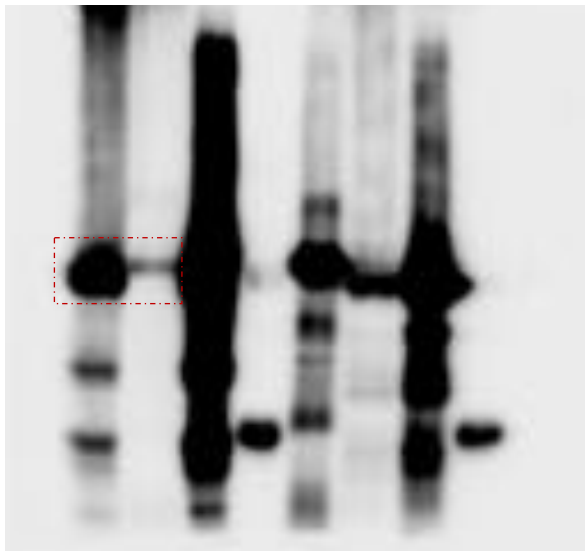

IP Flag-hTLR2/3

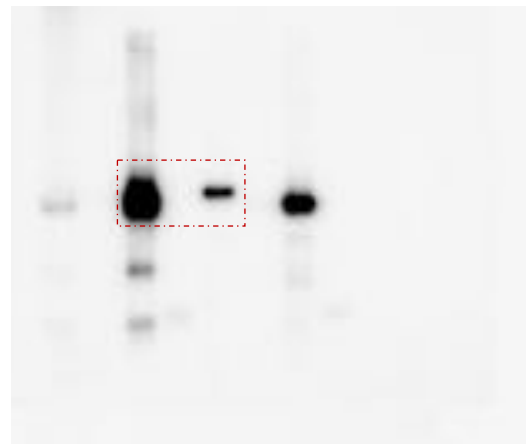

IB: Actin

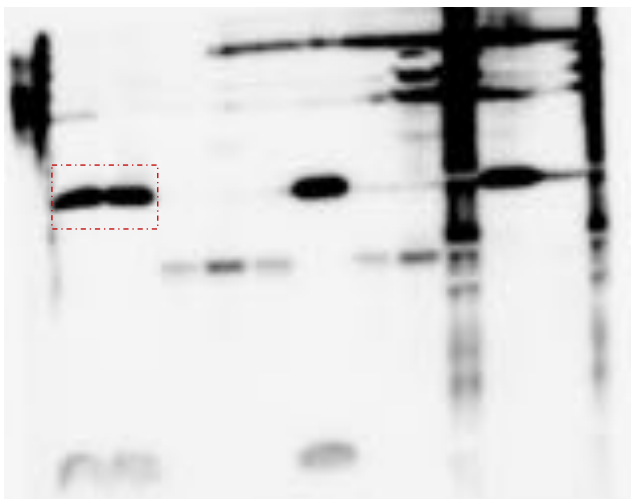

**Figure 3J**

Input His-Envelope

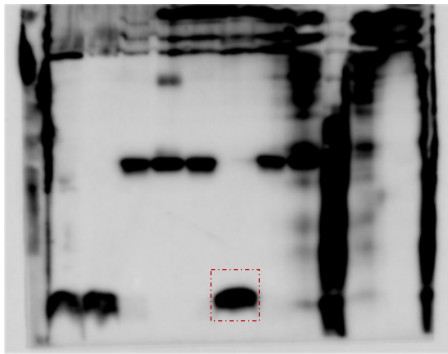

IP His-Envelope

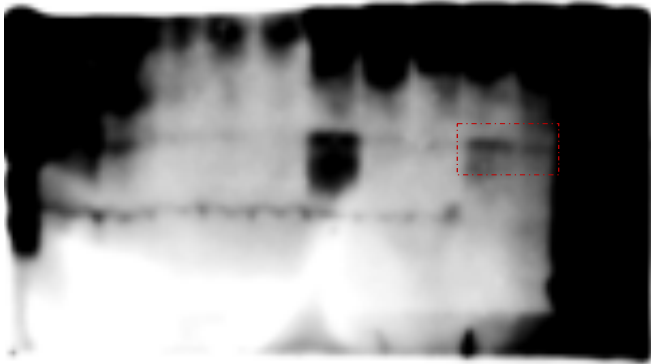

Input Flag-mTLR2

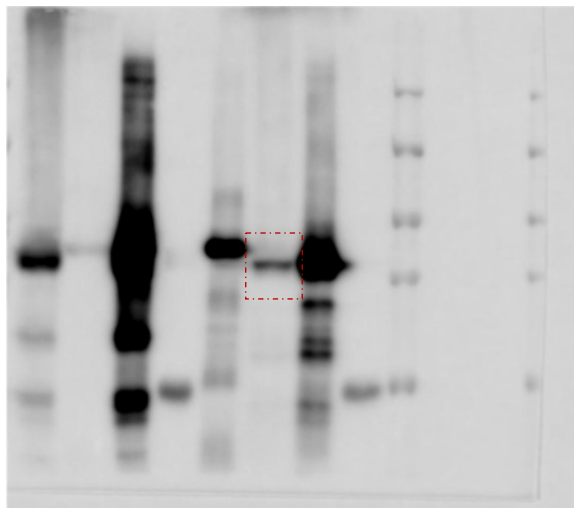

IP Flag-mTLR2

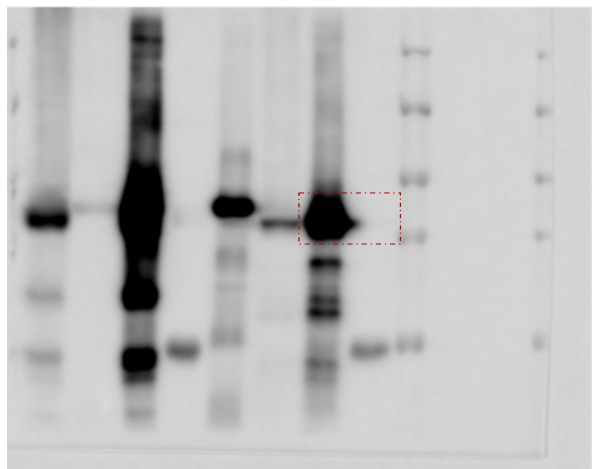

Supplement: NIHMS1695108-supplement-Figure_3_Uncropped_blots.pdf [file NIHMS1695108-supplement-Figure_3_Uncropped_blots.pdf]
