# Supplementary material
Source: PubMed Central journal article supplement (PMC8882317)

# Sup Figure 4A

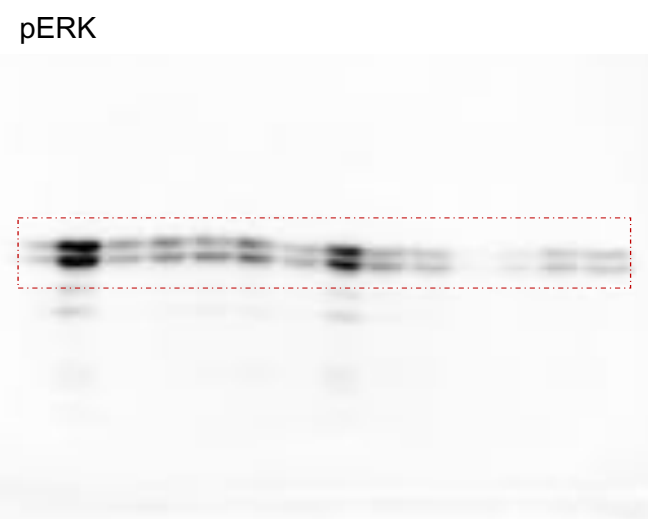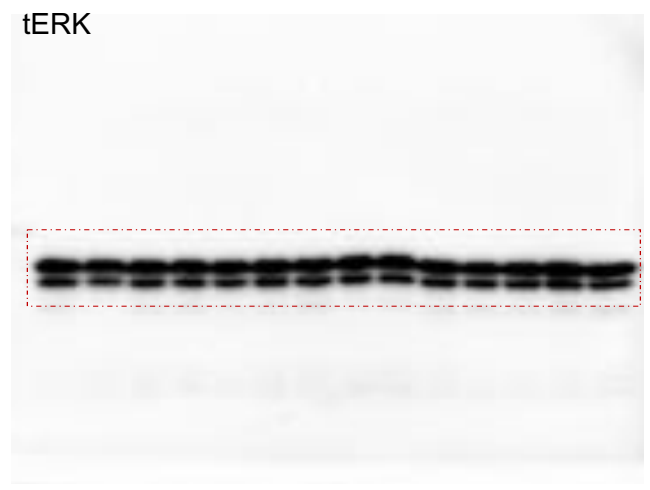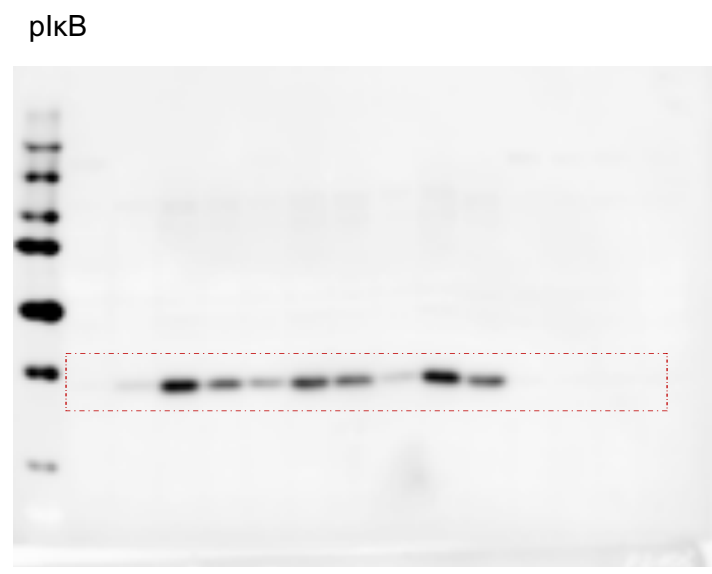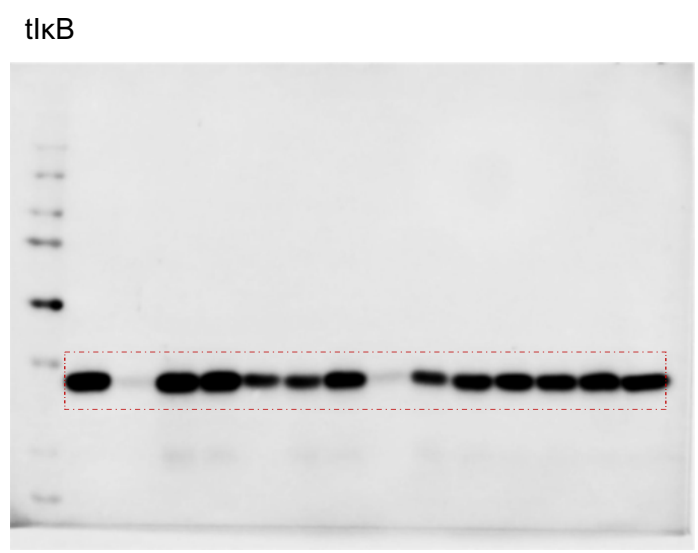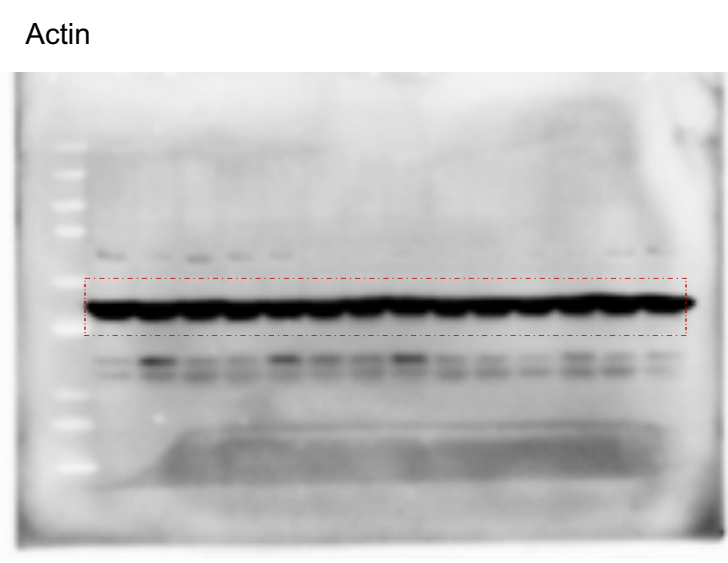

# Sup Figure 4B

pERK

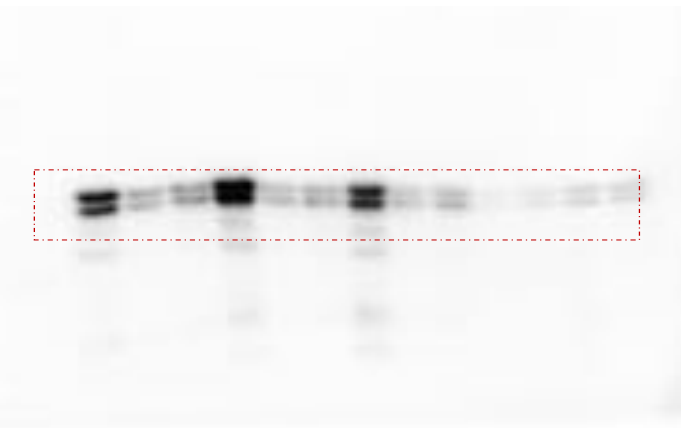

tERK

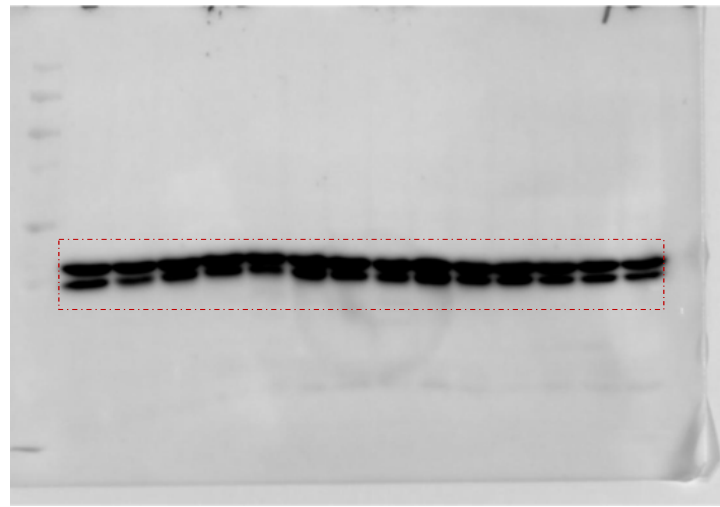

pI $\kappa$ B

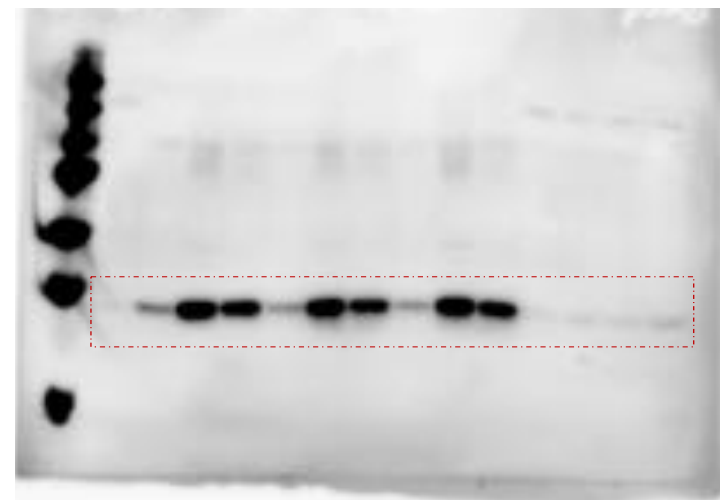

tI $\kappa$ B

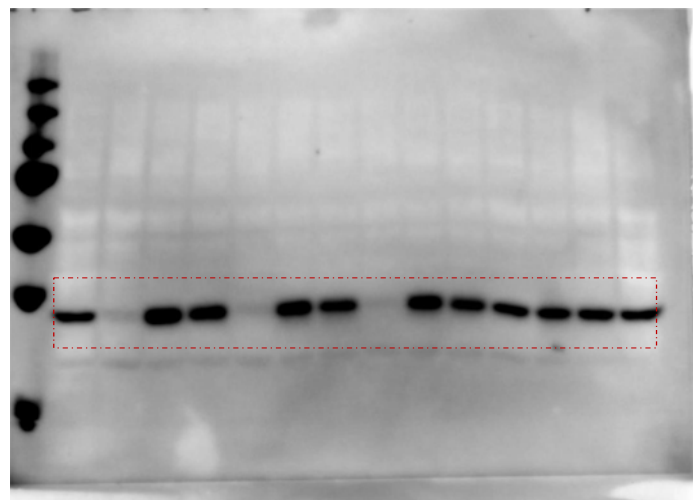

Actin

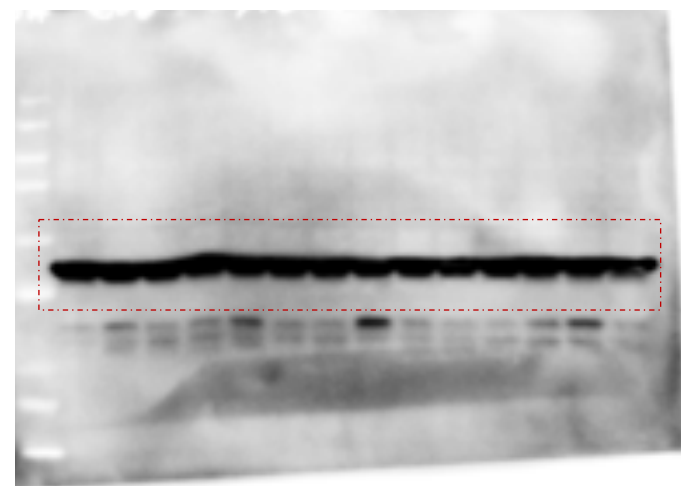

Supplement: NIHMS1695108-supplement-Extended_Data_Fig__4_uncropped_blots.pdf [file NIHMS1695108-supplement-Extended_Data_Fig__4_uncropped_blots.pdf]

**Sup Figure 6A**

pERK

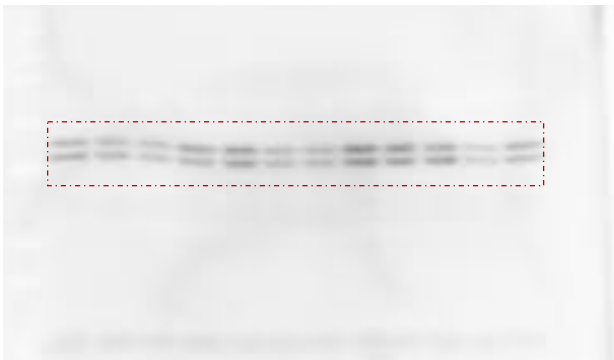

tERK

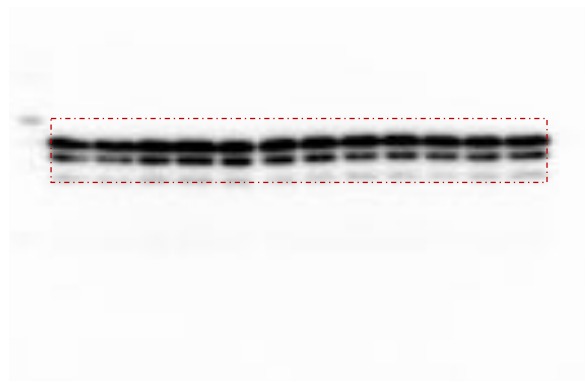

pIκB

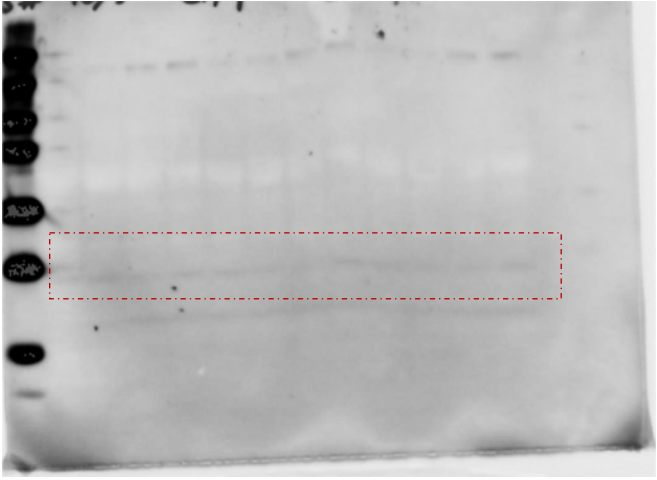

tIκB

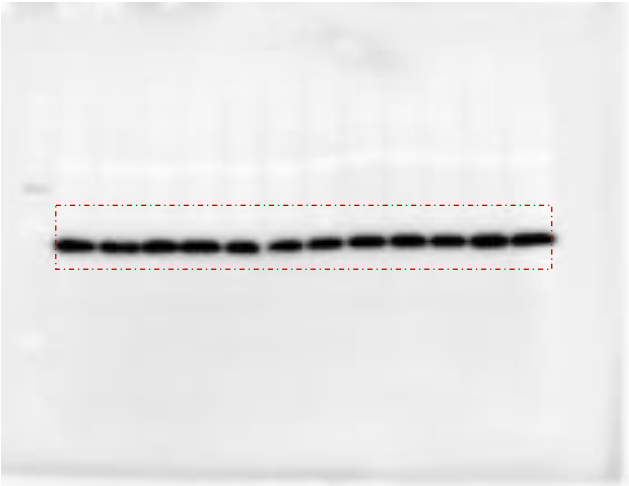

Actin

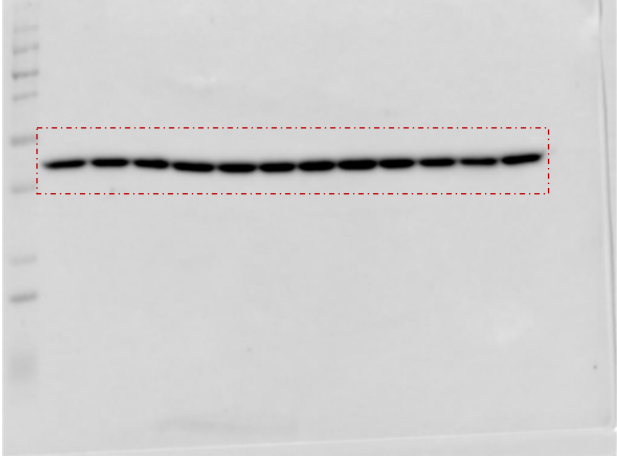

**Sup Figure 6H**

CASP1

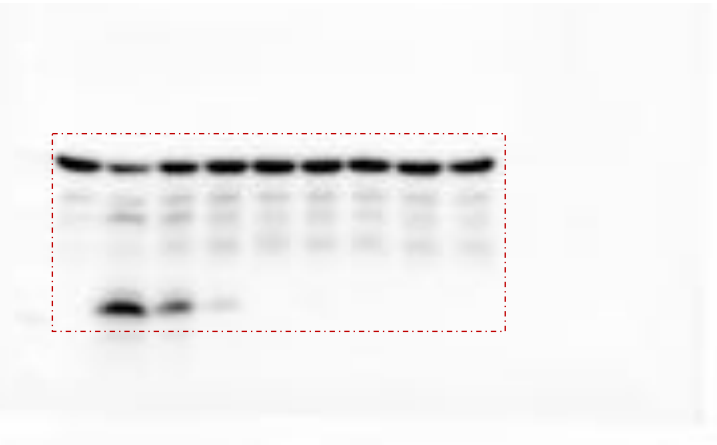

GSDMD

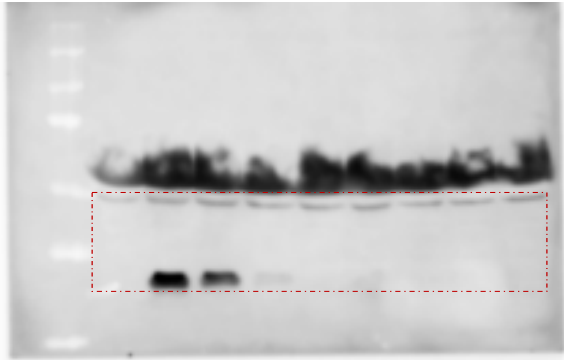

Actin

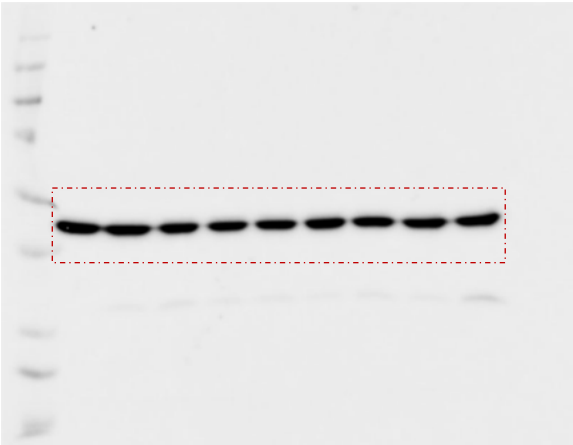

Supplement: NIHMS1695108-supplement-Extended_Data_Fig__6_uncropped_blots.pdf [file NIHMS1695108-supplement-Extended_Data_Fig__6_uncropped_blots.pdf]

**Figure 1K**

pERK

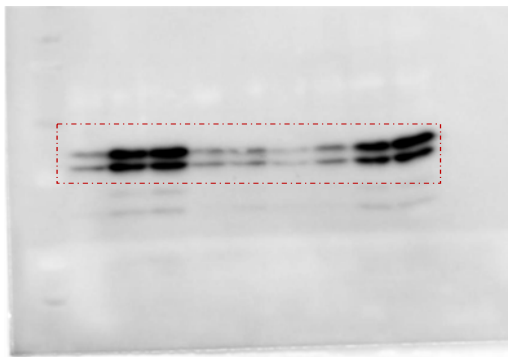

tERK

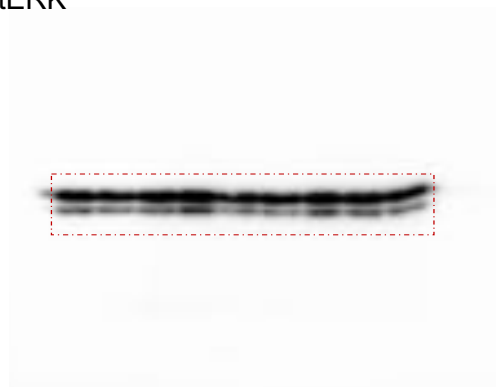

pIκB

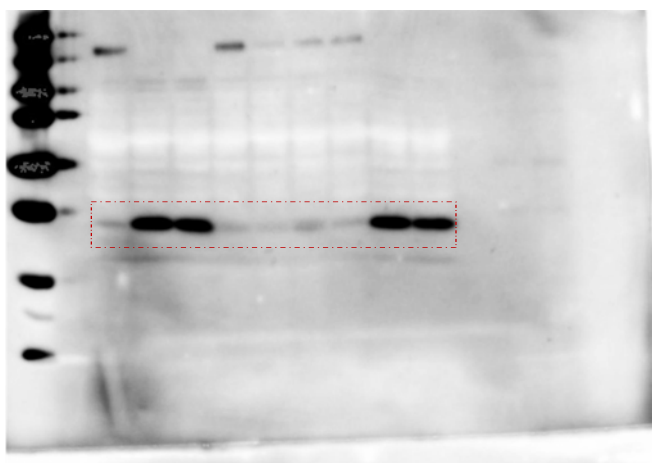

tIκB

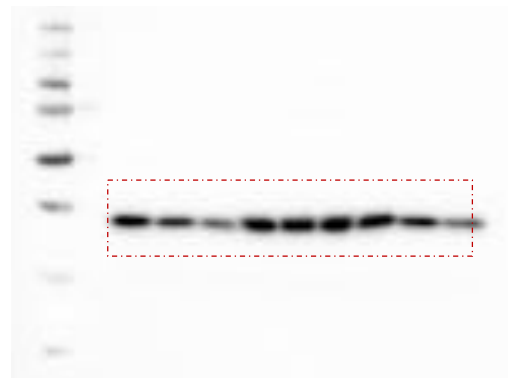

Actin

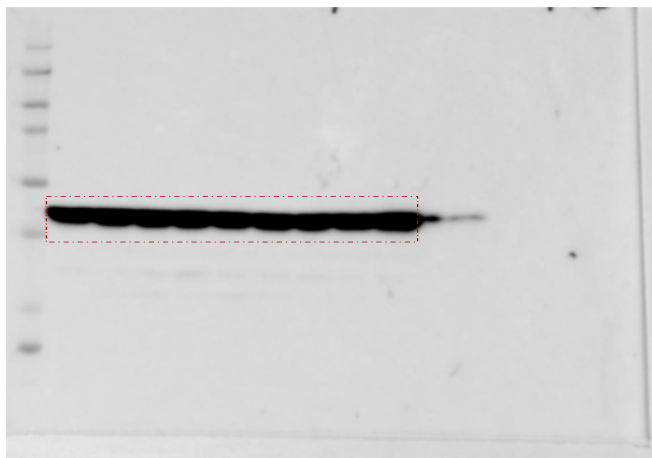

Supplement: NIHMS1695108-supplement-Figure_1_uncropped_blots.pdf [file NIHMS1695108-supplement-Figure_1_uncropped_blots.pdf]

Figure 2D

pERK

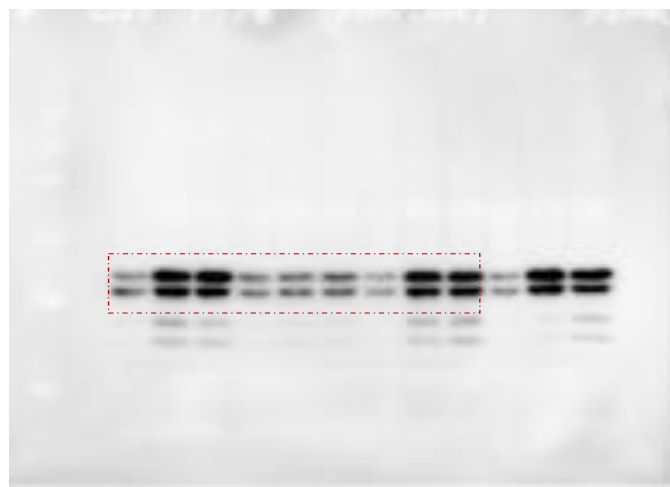

tERK

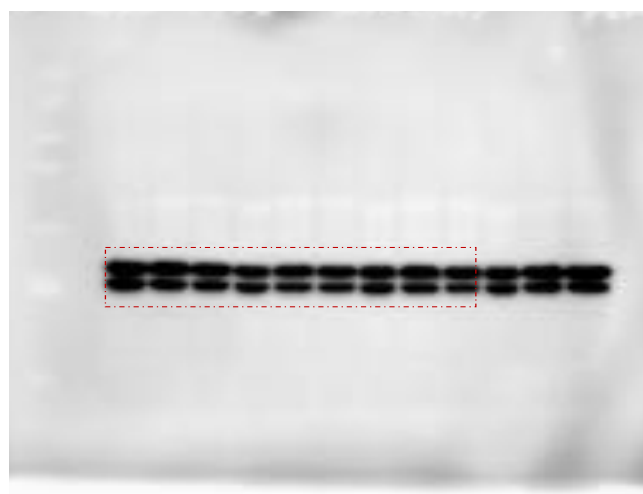

plkB

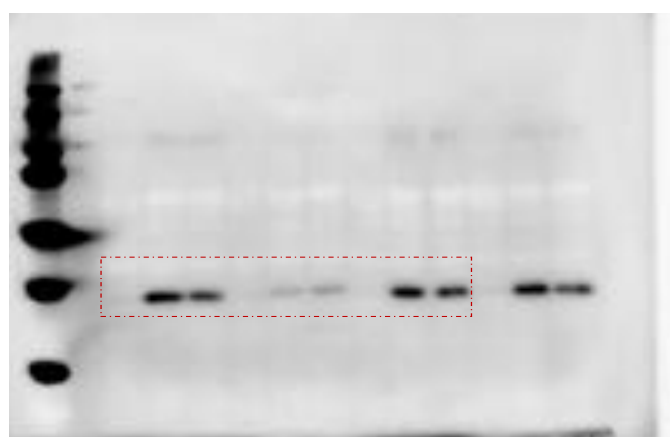

tlkB

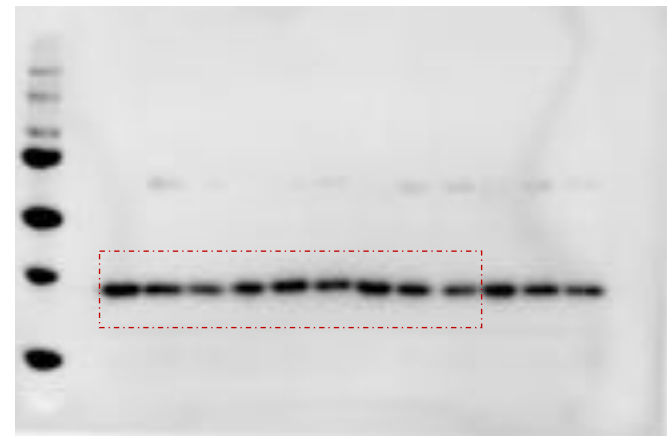

GAPDH

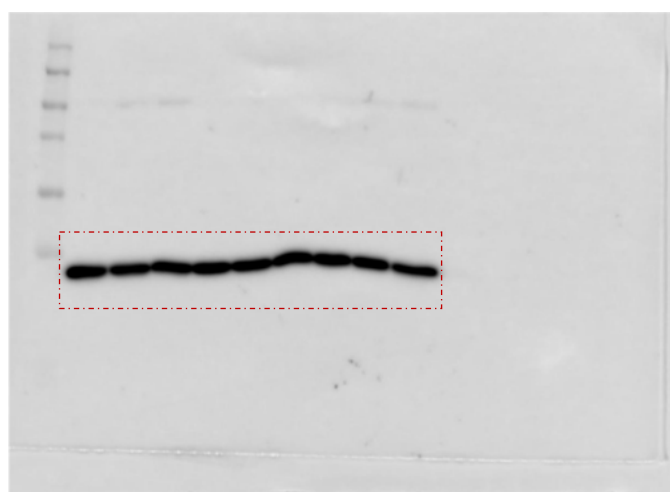

Supplement: NIHMS1695108-supplement-Figure_2_Uncropped_blots.pdf [file NIHMS1695108-supplement-Figure_2_Uncropped_blots.pdf]
